# Supplementary material for: Diffraction contrast in cryo-scanning transmission electron tomography reveals the boundary of hemozoin crystals in situ
Source: Royal Society of Chemistry journal article supplement (doi:10.1039/d2fd00088a), 2022-01-01
Supplement: d2fd00088a7.pdf [file d2fd00088a7.pdf]

## Supplementary Information

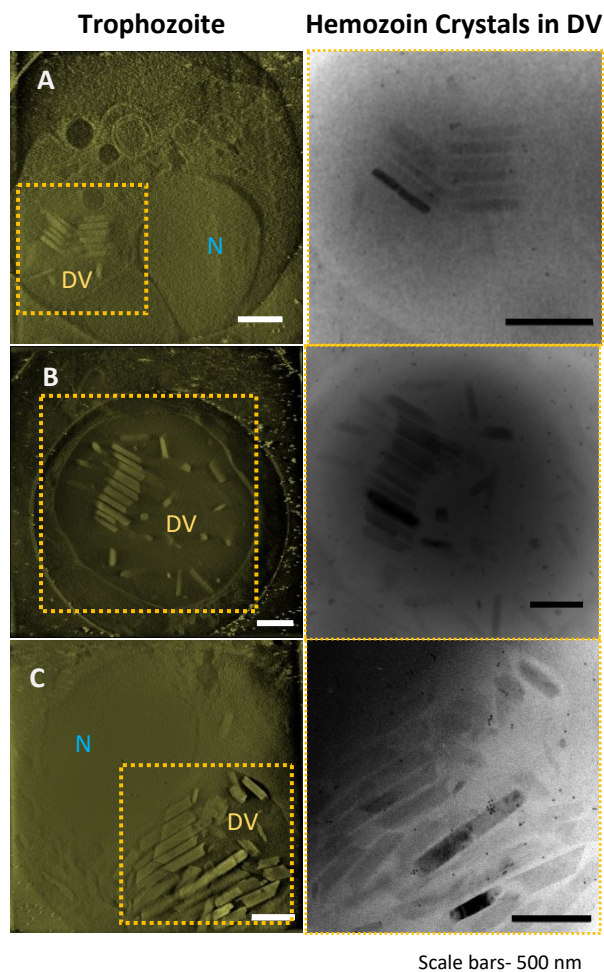

**Fig S1: Hemozoin crystals remain mutually aligned within the DV of trophozoite-stage parasites** The parasites were plunge-frozen and imaged using CSTET. The tilt-series were reconstructed using IMOD and a slice from a thick volume is shown in panel (i) is helpful to identify cellular features like the digestive vacuole (DV; inset shown in panel ii) and nucleus (N). Projection images from the aligned tilt-series shown in panel (ii) were used for observation of Bragg diffraction across specific tilt-angles. **(A)** A trophozoite with mutually aligned hemozoin crystals that go dark and bright in a single slice from the tilt-series crystals are observed **(B)** Another instance of a parasite with mutually aligned hemozoin crystals visibly larger than the previous one. A single tilt with crystals that are dark and bright **(C)** Likely a later trophozoite with a large nucleus and crystals tightly-packed within a DV.

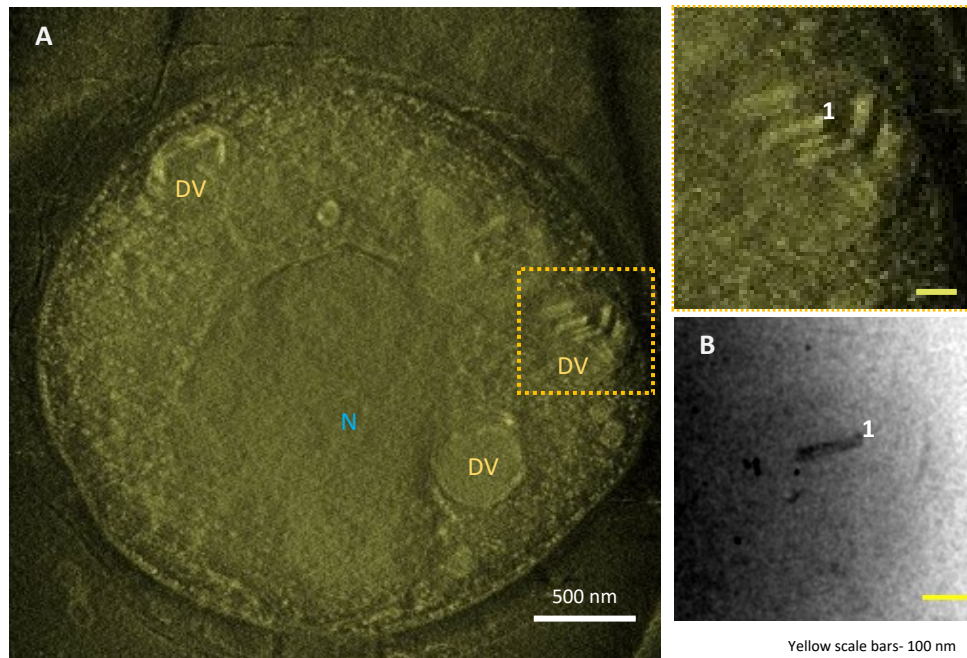

**Fig S2: Ring-stage parasite have multiple proto-DVs enclosing small-sized crystals**

**(A)** A thick-volume slice from a reconstruction showing a single nucleus and multiple spherical proto-DVs. The inset is of a single proto-DV **(B)** A crystal that appears dark in a slice of a tilt-series.

## Supplementary Movies

The aligned tilt-series is normalized for intensities to ensure that the crystals are visible in the higher tilts.

SV1: Trophozoite aligned tilt-series of the DV- [G4\\_\\_BF\\_ali\\_Crop.norm.avi](#)

SV2: Trophozoite reconstruction of DV- [G4\\_\\_BF\\_bin2\\_rec\\_Z106-348\\_GBp75.avi](#)

SV3: Schizont aligned tilt-series of the DV- [DM1\\_tomo1\\_BF\\_ali\\_Bin2.norm.avi](#)

SV4: Schizont reconstruction of DV- [DM1\\_tomo1\\_BF\\_bin2\\_rec\\_Crop\\_GBp75.avi](#)

SV5: Ring-stage aligned tilt-series of the DV- [DM126\\_3\\_Rings\\_Cell\\_5\\_1\\_ali\\_Bin2.norm.avi](#)

SV6: Ring-stage reconstruction of DV- [DM126\\_3\\_Rings\\_Cell\\_5\\_1\\_rec\\_bin2\\_z138\\_425.avi](#)

SV7: Reconstruction cryo-FIB milled CSTET data of DV- [DM48\\_Tomo\\_2\\_BF\\_rec\\_bin2\\_smooth.avi](#)

SV8: Aligned tilt-series from cryo-FIB milled lamella- [DM48\\_Tomo\\_2\\_BF\\_ali\\_bin2\\_Z2-61.norm.avi](#)
